# Supplementary material for: Evaluating the Role of Corrals and Insects in the Transmission of Porcine Cysticercosis: A Cohort Study
Source: MDPI journal article supplement (doi:10.3390/pathogens12040597), 2023-04-14
Supplement: s1 [file s1]

Article

# Evaluating the Role of Corrals and Insects in the Transmission of Porcine Cysticercosis: A Cohort Study

Eloy Gonzales-Gustavson <sup>1,\*</sup>, Ian W. Pray <sup>2</sup>, Ricardo Gamboa <sup>3</sup>, Claudio Muro <sup>3</sup>, Percy Vilchez <sup>3</sup>, Luis Gomez-Puerta <sup>1</sup>, Ana Vargas-Calla <sup>1</sup>, Gabrielle Bonnet <sup>4</sup>, Francesco Pizzitutti <sup>5</sup>, Hector H. Garcia <sup>3,6</sup>, Armando E. Gonzalez <sup>1</sup> and Seth E. O'Neal <sup>2,3,\*</sup> on behalf of the Cysticercosis Working Group in Peru

<sup>1</sup> Departamento de Salud Animal y Salud Pública, Universidad Nacional Mayor de San Marcos, Lima 15081, Peru

<sup>2</sup> School of Public Health, Oregon Health & Science University and Portland State University, Portland, OR 97239, USA

<sup>3</sup> Center of Global Health, Universidad Peruana Cayetano Heredia, Lima 15202, Peru

<sup>4</sup> Centre for the Mathematical Modeling of Infectious Diseases, London School of Hygiene and Tropical Medicine, London WC1H 9SH, UK

<sup>5</sup> Geography Institute, Universidad San Francisco de Quito, Quito 170157, Ecuador

<sup>6</sup> Cysticercosis Unit, National Institute of Neurological Sciences, Lima 15003, Peru

\* Correspondence: egonzalesg@unmsm.edu.pe (E.G.-G.); oneals@ohsu.edu (S.E.O.)

**Citation:** Gonzales-Gustavson, E.; Pray, I.W.; Gamboa, R.; Muro, C.; Vilchez, P.; Gomez-Puerta, L.; Calla, A.V.; Bonnet, G.; Pizzitutti, F.; Garcia, H.H.; et al. Evaluating the Role of Corrals and Insects in the Transmission of Porcine Cysticercosis: A Cohort Study. *Pathogens* **2023**, *12*, 597. <https://doi.org/10.3390/pathogens12040597>

Academic Editor: Hans-Peter Fuehrer

Received: 16 March 2023

Revised: 5 April 2023

Accepted: 12 April 2023

Published: 14 April 2023

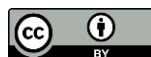

**Copyright:** © 2023 by the authors. Licensee MDPI, Basel, Switzerland. This article is an open access article distributed under the terms and conditions of the Creative Commons Attribution (CC BY) license (<https://creativecommons.org/licenses/by/4.0/>).

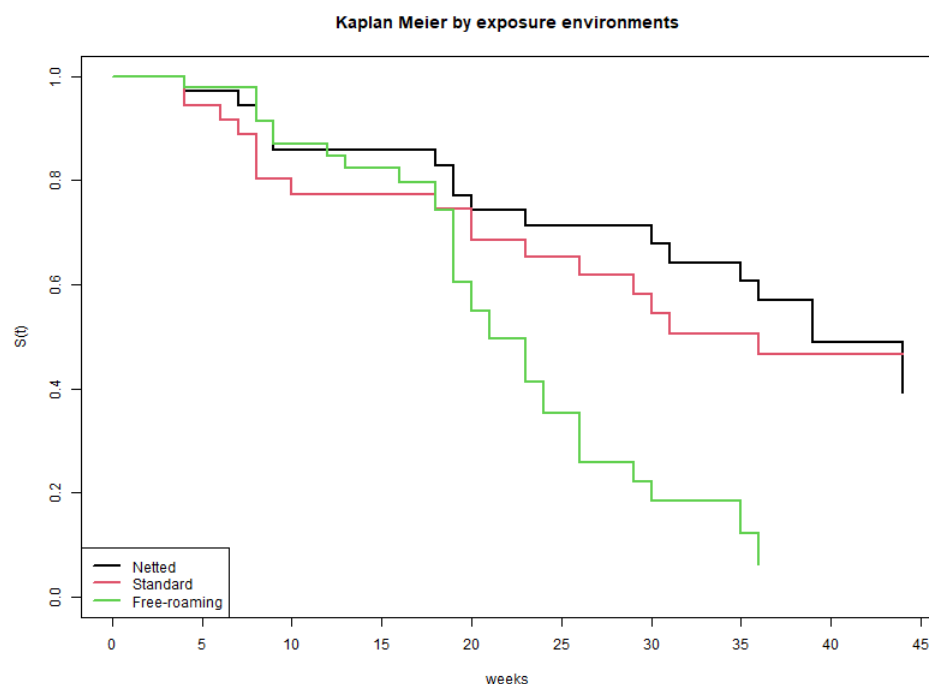

**Figure S1.** Kaplan Meier survival curve with the time to develop a EITB positive result between the three kinds of exposure environments evaluated: netted corrals, standard corrals, and free roaming.

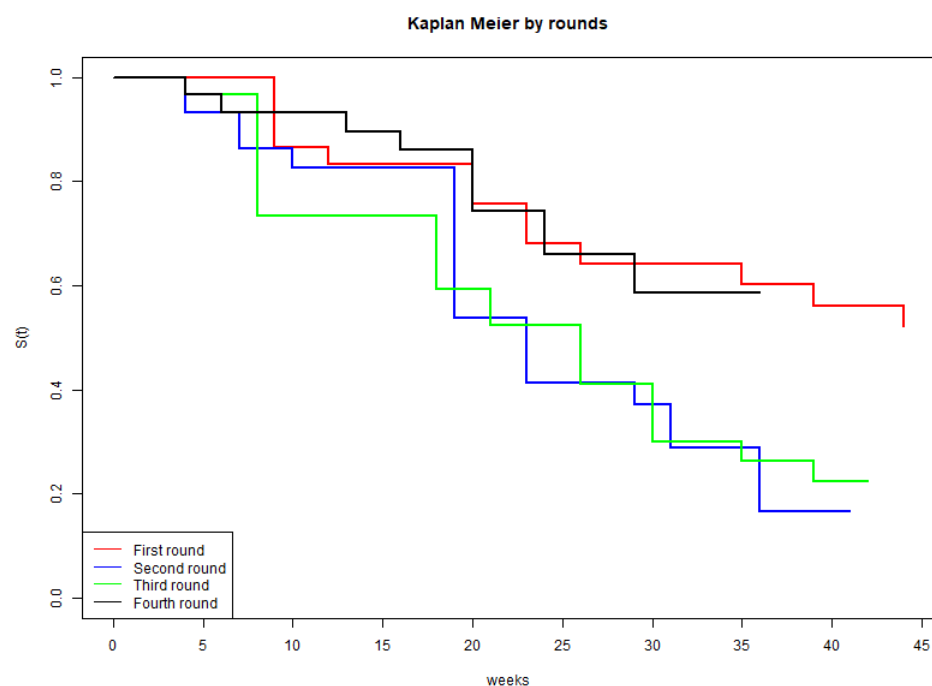

**Figure S2.** Kaplan Meier survival curve with the time to develop a EITB positive result between the four rounds evaluated.

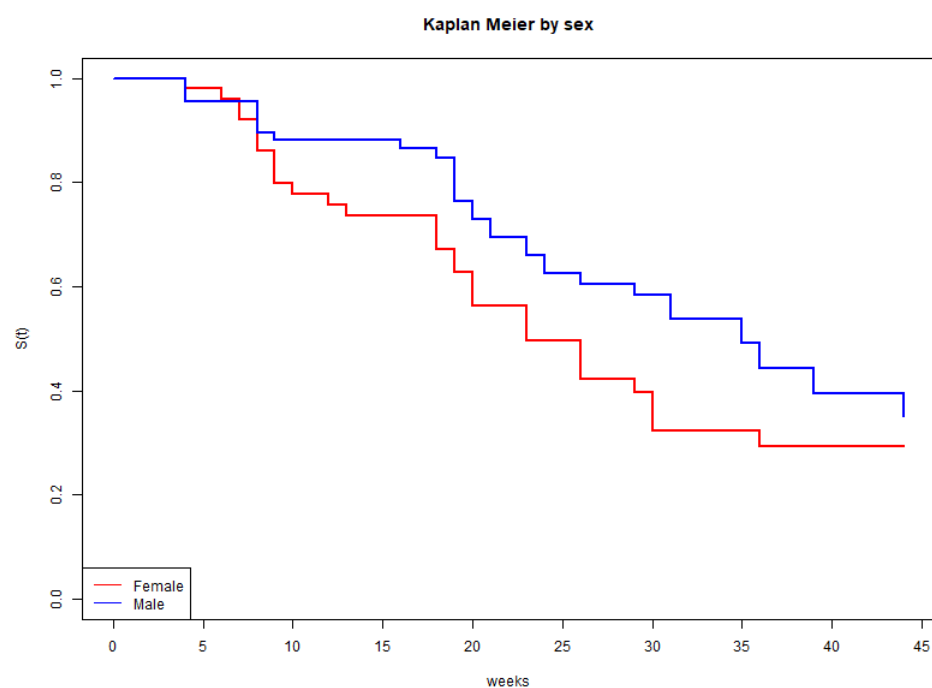

**Figure S3.** Kaplan Meier survival curve with the time to develop a EITB positive result between sex (male in blue and female in red) of pigs.

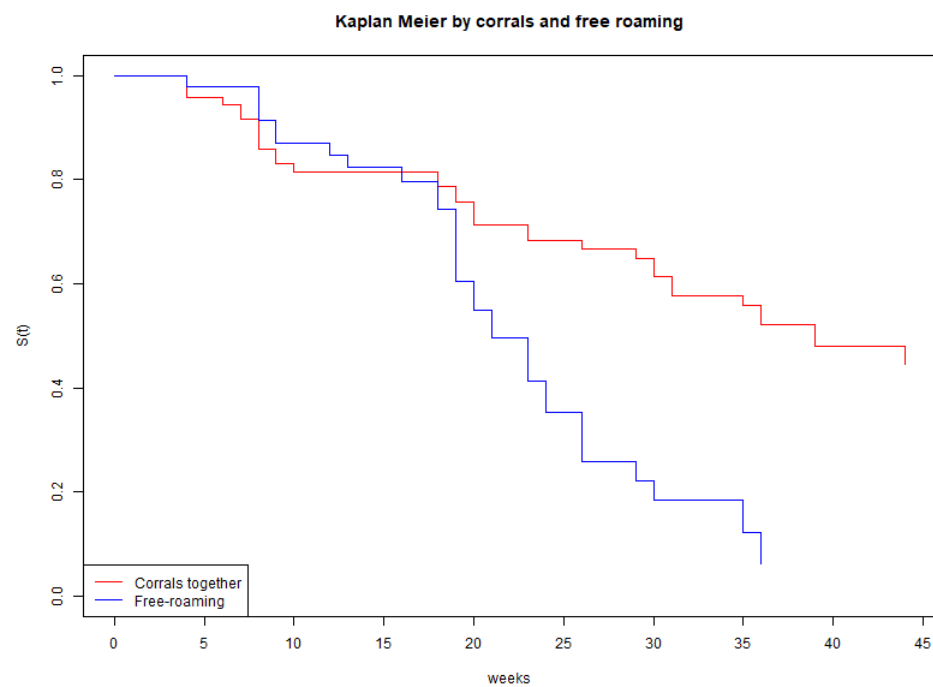

**Figure S4.** Kaplan Meier survival curve with the time to develop a EITB positive result between corral groups (red) and free-roaming (blue).

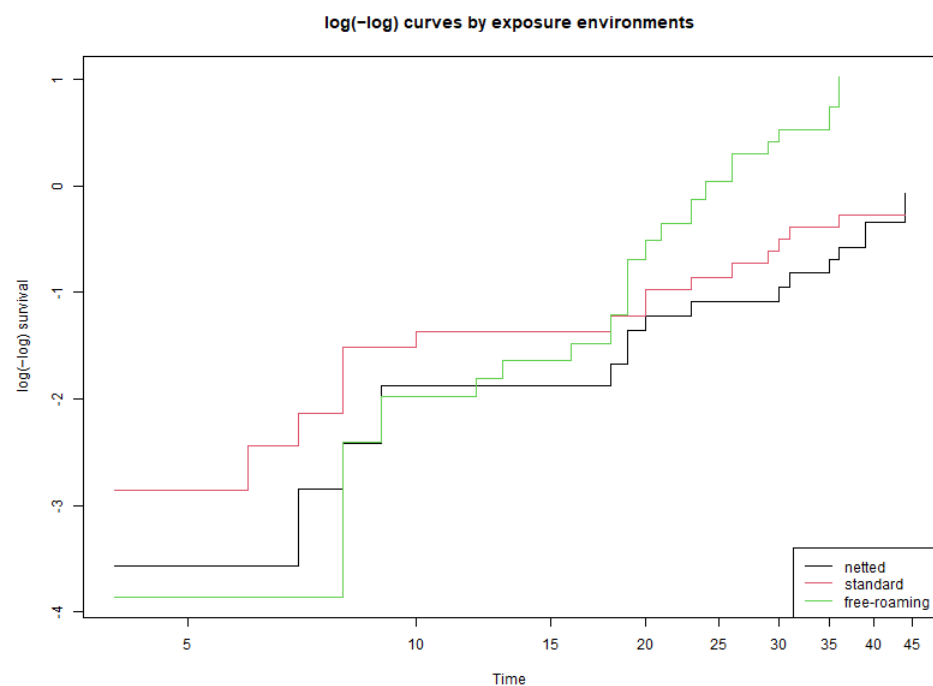

**Figure S5.** Estimated  $-\ln(-\ln) \log(-\log)$  survivor curves over the three categories of breeding system. Parallel curves are not observed which assumes Proportional hazard is not satisfied.

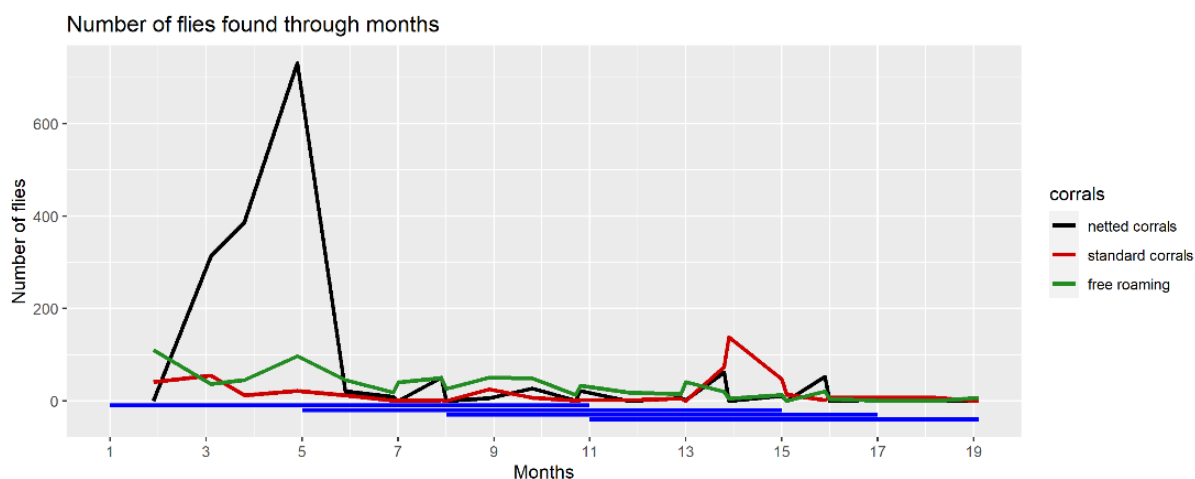

**Figure S6.** Number of flies caught through time (months) in the three breeding systems, blue lines at the bottom correspond to each round.

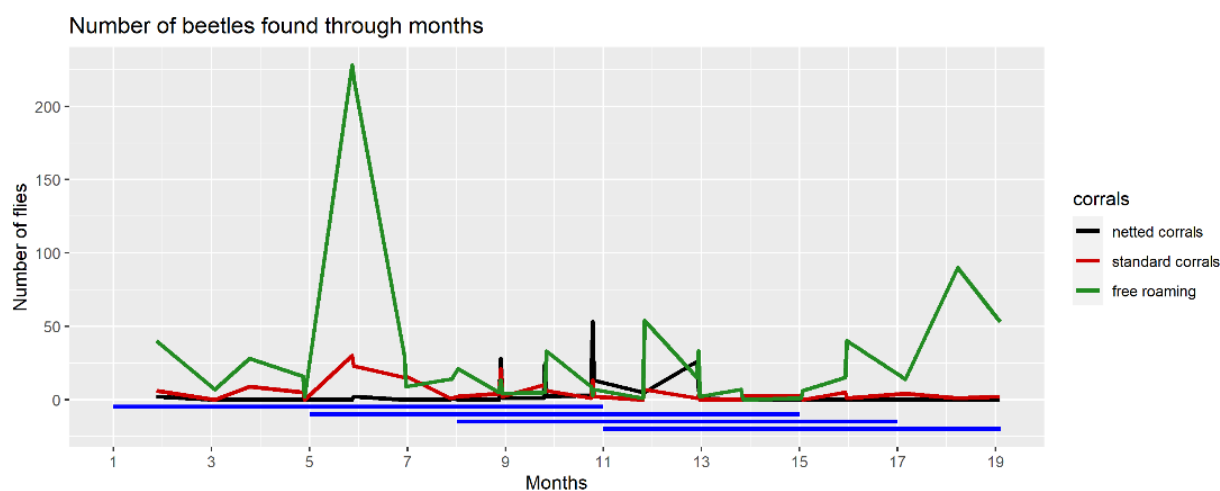

**Figure S7.** Number of beetles caught through time (months) in the three breeding systems, blue lines at the bottom correspond to each round.

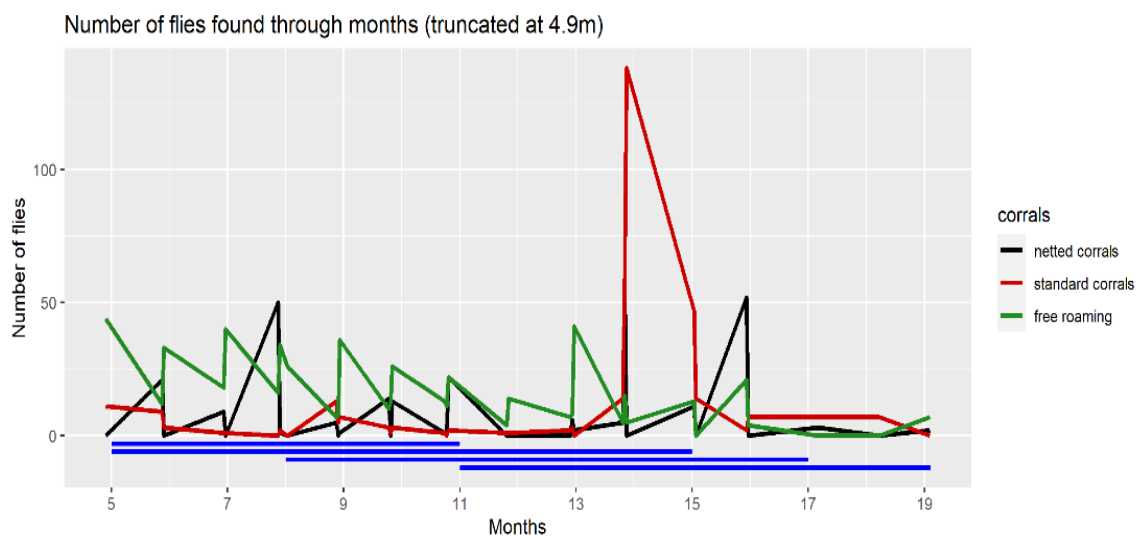

**Figure S8.** Number of flies caught through time (from 4.9 months into the study) in the three breeding systems, blue lines at the bottom correspond to each round.

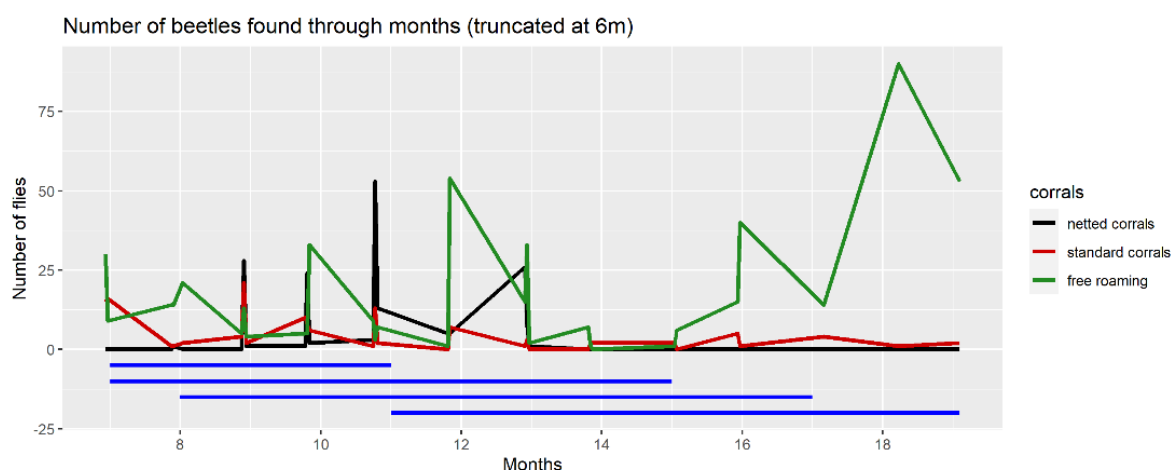

**Figure S9.** Number of flies caught through time (from 6 months into the study) in the three breeding systems, blue lines at the bottom correspond to each round.

**Table S1.** Cox proportional hazard model with three independent variables: breeding system, rounds and sex.

| Variable            | PH*  | lower 0.95 | upper 0.95 | p-value |
|---------------------|------|------------|------------|---------|
| <b>Groups</b>       |      |            |            |         |
| Standard/Netted     | 1.30 | 0.66       | 2.58       | 0.4     |
| Free roaming/Netted | 3.18 | 1.70       | 5.97       | 0.0003  |
| <b>Sex</b>          |      |            |            |         |
| Male/Female         | 0.62 | 0.38       | 1.01       | 0.056   |
| <b>Round</b>        |      |            |            |         |
| Second / First      | 2.62 | 1.27       | 5.41       | 0.009   |
| Third / First       | 2.40 | 1.18       | 4.91       | 0.016   |
| Fourth / First      | 0.99 | 0.42       | 2.33       | 1.0     |

\*PH: Proportional hazard.

**Table S2.** Goodness of fit for the model in Table S2.

| Variable             | chisq * | df | p-value |
|----------------------|---------|----|---------|
| Exposure environment | 12.96   | 2  | 0.002   |
| Sex                  | 1       | 1  | 0.3     |
| Round                | 1.06    | 3  | 0.8     |
| Global               | 14.57   | 6  | 0.02    |

\* Chi-squared test.

**Table S3.** Goodness of fit for the model in Table 2.

| Variable                                | chisq * | df | p-value |
|-----------------------------------------|---------|----|---------|
| Round                                   | 2.03    | 3  | 0.57    |
| Sex                                     | 1.03    | 1  | 0.31    |
| Free roaming /Corrals (before 18 weeks) | 1.41    | 1  | 0.24    |
| Free roaming /Corrals (after 18 weeks)  | 0.27    | 1  | 0.6     |
| Global                                  | 4.31    | 6  | 0.63    |

\* Chi-squared test.

**Table S4.** Maximum number of reactive bands observed on the LLGP-EITB test throughout the observation period, among pigs in each exposure environment.

| Environment     | <i>T. solium</i> cysts at necropsy | number of maximum bands |     |   |     |
|-----------------|------------------------------------|-------------------------|-----|---|-----|
|                 |                                    | 0                       | 1–2 | 3 | 4–7 |
| Netted corral   | no                                 | 19                      | 15  | 1 | 0   |
|                 | yes                                | 0                       | 0   | 0 | 0   |
| Standard corral | no                                 | 20                      | 13  | 2 | 1   |
|                 | yes                                | 0                       | 0   | 0 | 0   |
| Free roaming    | no                                 | 7                       | 11  | 4 | 0   |
|                 | yes                                | 2                       | 5   | 5 | 3   |

**Table S5.** Number of pigs infected with *T. solium* by rounds (only in free roaming).

| Rounds | Negative | Positive |
|--------|----------|----------|
| First  | 8        | 0        |
| Second | 6        | 4        |
| Third  | 3        | 7        |
| Fourth | 5        | 4        |

Pearson's Chi-squared test,  $p$ -value = 0.027.

**Table S6.** Number of pigs infected with *T. solium* by sex (only in free roaming).

|        | Negative | Positive |
|--------|----------|----------|
| Female | 9        | 6        |
| Male   | 13       | 9        |

Pearson's Chi-squared test,  $p$ -value = 1.

**Disclaimer/Publisher's Note:** The statements, opinions and data contained in all publications are solely those of the individual author(s) and contributor(s) and not of MDPI and/or the editor(s). MDPI and/or the editor(s) disclaim responsibility for any injury to people or property resulting from any ideas, methods, instructions or products referred to in the content.
